# Supplementary material for: Treatment fidelity in a pragmatic clinical trial of music therapy for premature infants and their parents: the LongSTEP study
Source: PubMed Central journal article supplement (PMC9983212; doi:10.1186/s13063-022-06971-w), 2023-03-03
Supplement: 13063_2022_6971_MOESM4_ESM.pdf [file 13063_2022_6971_MOESM4_ESM.pdf]

TR\_7 | The music therapist encouraged me to use my voice and singing to connect with my baby in the music therapy sessions:

I completely agree

|  |  |  |  |  |  |  |
|--|--|--|--|--|--|--|
|  |  |  |  |  |  |  |
|--|--|--|--|--|--|--|

I completely disagree

TR\_8 | I actively participated in the music therapy sessions. For example, by singing, humming, touching and/or moving my baby to the music, and/or making up songs and lyrics:

I completely agree

|  |  |  |  |  |  |  |
|--|--|--|--|--|--|--|
|  |  |  |  |  |  |  |
|--|--|--|--|--|--|--|

I completely disagree

TR\_9 | The music was adjusted according to my baby's reaction to it. For example, we changed tempo, volume, or melody to interact with my baby, or paused and made the music simpler if the baby seemed to need a break:

I completely agree

|  |  |  |  |  |  |  |
|--|--|--|--|--|--|--|
|  |  |  |  |  |  |  |
|--|--|--|--|--|--|--|

I completely disagree

TR\_10 | We used music that my family and I know and like in the music therapy sessions:

I completely agree

|  |  |  |  |  |  |  |
|--|--|--|--|--|--|--|
|  |  |  |  |  |  |  |
|--|--|--|--|--|--|--|

I completely disagree

TR\_11 | I experienced in the music therapy sessions that I have something unique and important to offer my baby through my voice:

I completely agree

|  |  |  |  |  |  |  |
|--|--|--|--|--|--|--|
|  |  |  |  |  |  |  |
|--|--|--|--|--|--|--|

I completely disagree

*Thank you for completing this questionnaire! We appreciate your time and effort.*
